# Supplementary material for: Molecular foundations of chilling-tolerance of modern maize
Source: PubMed Central journal article supplement (PMC4761173; doi:10.1186/s12864-016-2453-4), 2016-02-20
Supplement: 12864_2016_2453_MOESM6_ESM.pdf [file 12864_2016_2453_MOESM6_ESM.pdf]

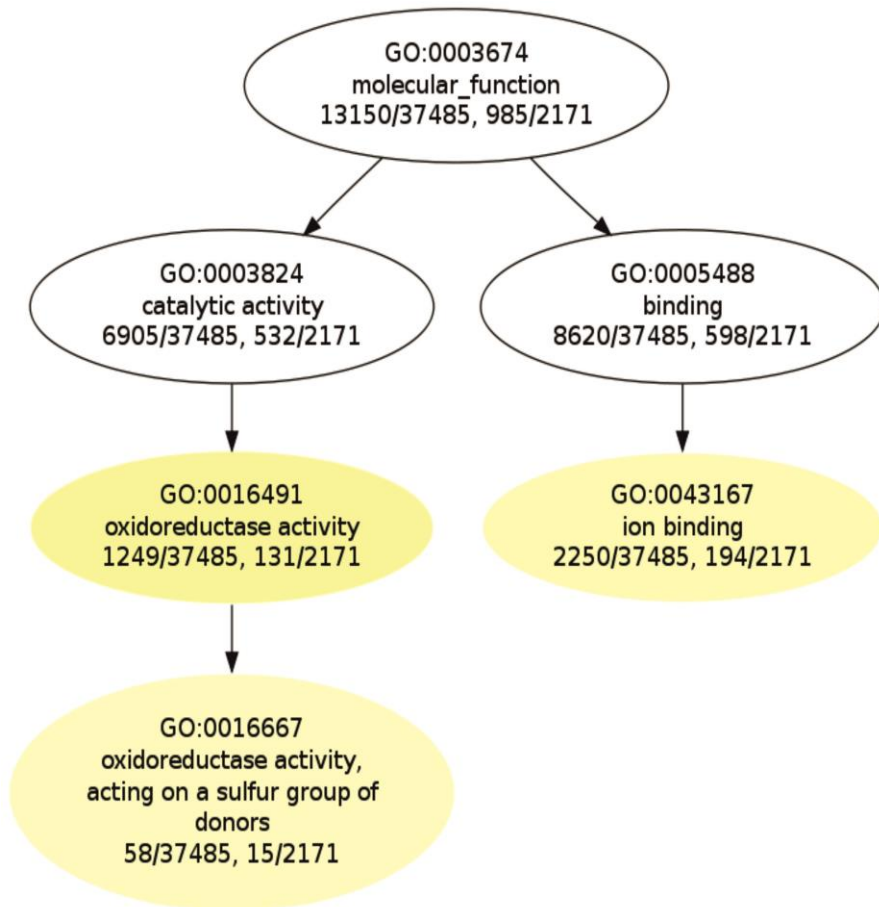

Additional file 6.. Gene Ontology categories of GO class “Molecular Function” significantly over-represented among transcripts down-regulated by cold treatment in S68911 inbred line. Only the relevant fragment of the GO graph is shown with over-represented categories highlighted. Numbers attributed to a GO term indicate, respectively: total number of proteins described by this GO term in the population/size of the population; number of cold-repressed proteins described by this GO term/total number of cold-repressed proteins
