# Supplementary material for: Molecular foundations of chilling-tolerance of modern maize
Source: PubMed Central journal article supplement (PMC4761173; doi:10.1186/s12864-016-2453-4), 2016-02-20
Supplement: 12864_2016_2453_MOESM26_ESM.pdf [file 12864_2016_2453_MOESM26_ESM.pdf]

Additional file 26. Primers for miRNA

|                                 | Forward primers       | Primers for reverse transcription                      |
|---------------------------------|-----------------------|--------------------------------------------------------|
| zma-MIR164<br>a/b/c/d/g*        | CATGCATGGAGAAGCAGGGCA | GTCGTATCCAGTGCAGGGTCCGAGGTATTCCG<br>ACTGGATACGACTGCACG |
| zma-MIR167<br>a/b/c/d*          | GCACGGTGAAGCTGCCAGCAT | GTCGTATCCAGTGCAGGGTCCGAGGTATTCCG<br>ACTGGATACGACTAGATC |
| zma-MIR172<br>b/c/d*            | GCTCCGAGAATCTTGATGAT  | GTCGTATCCAGTGCAGGGTCCGAGGTATTCCG<br>ACTGGATACGACTGCAGC |
| zma-MIR168<br>a/b*              | CGACTGTCGCTTGGTGCAGAT | GTCGTATCCAGTGCAGGGTCCGAGGTATTCCG<br>ACTGGATACGACGTCCCG |
| zma-MIR171<br>a/d/e/i/j/n       | TGTTCGTGATTGAGCCGCGCC | GTCGTATCCAGTGCAGGGTCCGAGGTATTCCG<br>ACTGGATACGACGATATT |
| zma-MIR162                      | GCTCCGTCGATAAACCTCTG  | GTCGTATCCAGTGCAGGGTCCGAGGTATTCCG<br>ACTGGATACGACTGGATG |
| zma-MIR169<br>a/b               | TGTCCGCAGCCAAGGATGACT | GTCGTATCCAGTGCAGGGTCCGAGGTATTCCG<br>ACTGGATACGACTCGGCA |
| Universal<br>reverse<br>primer* | GTGCAGGGTCCGAGGT      |                                                        |

\*according to Liu et al. 2012 [75]
